# Supplementary material for: A Novel Blood-Based microRNA Diagnostic Model with High Accuracy for Multi-Cancer Early Detection
Source: MDPI journal article supplement (doi:10.3390/cancers14061450), 2022-03-11
Supplement: s1 [file s1]

Supplementary Files

# A Novel Blood-Based microRNA Diagnostic Model with High Accuracy for Multi-Cancer Early Detection

Andrew Zhang and Hai Hu

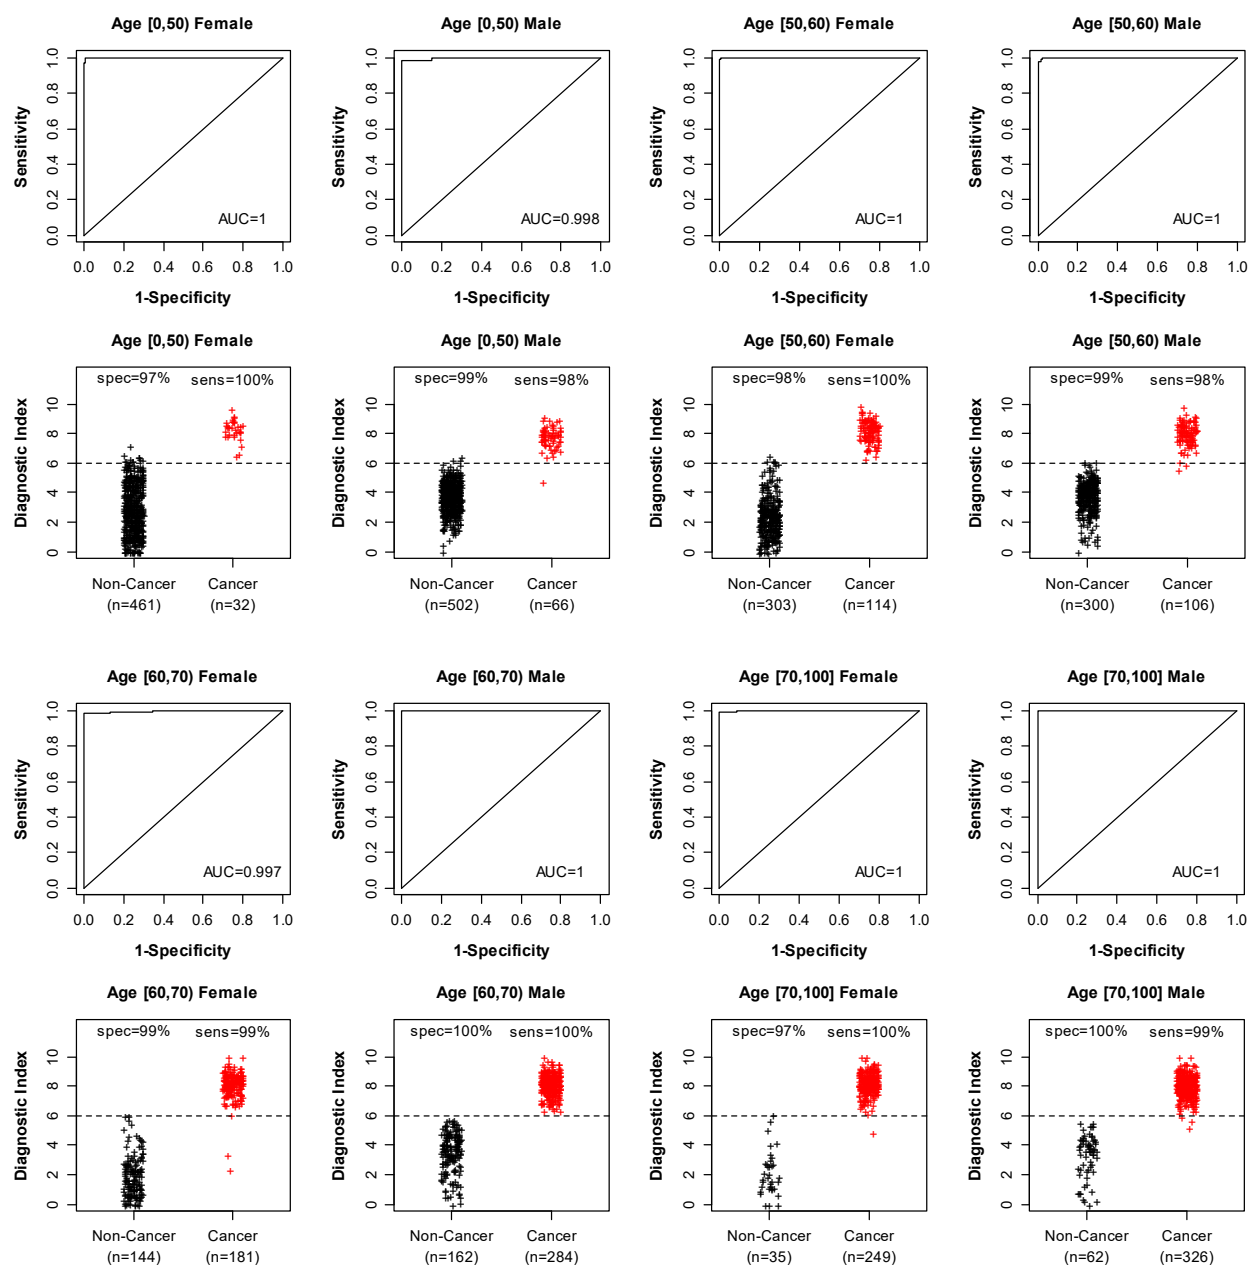

**Figure S1.** ROC analysis and distribution of diagnostic index across age and gender groups in the lung cancer dataset.

**Table S1.** Top 50 differentially expressed miRNAs from the lung cancer discovery set.

| miRBase Accession ID | Log Fold Change | Adjusted <i>p</i> Value | AUC of ROC | miRNA Names      |
|----------------------|-----------------|-------------------------|------------|------------------|
| MIMAT0022259         | 3.93            | $9.99 \times 10^{-176}$ | 1.00       | hsa-miR-5100     |
| MIMAT0019776         | 2.61            | $5.83 \times 10^{-94}$  | 0.97       | hsa-miR-1343-3p  |
| MIMAT0005880         | 6.54            | $2.22 \times 10^{-87}$  | 1.00       | hsa-miR-1290     |
| MIMAT0019957         | 1.85            | $6.81 \times 10^{-67}$  | 0.94       | hsa-miR-4787-3p  |
| MIMAT0027654         | 1.36            | $1.37 \times 10^{-63}$  | 0.95       | hsa-miR-6877-5p  |
| MIMAT0000071         | 4.09            | $1.66 \times 10^{-62}$  | 0.93       | hsa-miR-17-3p    |
| MIMAT0027430         | -0.69           | $5.09 \times 10^{-62}$  | 0.93       | hsa-miR-6765-5p  |
| MIMAT0018925         | -0.62           | $1.45 \times 10^{-61}$  | 0.94       | hsa-miR-1268b    |
| MIMAT0016879         | 1.78            | $6.45 \times 10^{-59}$  | 0.90       | hsa-miR-4258     |
| MIMAT0001631         | 5.01            | $3.71 \times 10^{-58}$  | 0.94       | hsa-miR-451a     |
| MIMAT0005582         | -0.78           | $1.01 \times 10^{-57}$  | 0.92       | hsa-miR-1228-5p  |
| MIMAT0031000         | 2.09            | $6.42 \times 10^{-55}$  | 0.91       | hsa-miR-8073     |
| MIMAT0018976         | 1.66            | $3.91 \times 10^{-51}$  | 0.90       | hsa-miR-4454     |
| MIMAT0004561         | 1.04            | $1.90 \times 10^{-50}$  | 0.91       | hsa-miR-187-5p   |
| MIMAT0016916         | 1.59            | $1.05 \times 10^{-49}$  | 0.88       | hsa-miR-4286     |
| MIMAT0027392         | 1.35            | $1.53 \times 10^{-49}$  | 0.87       | hsa-miR-6746-5p  |
| MIMAT0005867         | 1.20            | $9.31 \times 10^{-49}$  | 0.89       | hsa-miR-663b     |
| MIMAT0023700         | 0.79            | $2.77 \times 10^{-47}$  | 0.89       | hsa-miR-6075     |
| MIMAT0021021         | 0.80            | $3.16 \times 10^{-46}$  | 0.88       | hsa-miR-5001-5p  |
| MIMAT0027478         | 0.68            | $6.98 \times 10^{-46}$  | 0.89       | hsa-miR-6789-5p  |
| MIMAT0019050         | 1.06            | $1.19 \times 10^{-45}$  | 0.89       | hsa-miR-4513     |
| MIMAT0015076         | 4.11            | $1.76 \times 10^{-45}$  | 0.86       | hsa-miR-3192-5p  |
| MIMAT0030987         | 3.50            | $1.77 \times 10^{-45}$  | 0.88       | hsa-miR-8060     |
| MIMAT0026636         | 2.75            | $2.02 \times 10^{-45}$  | 0.89       | hsa-miR-668-5p   |
| MIMAT0005922         | -0.61           | $2.40 \times 10^{-45}$  | 0.87       | hsa-miR-1268a    |
| MIMAT0022742         | 1.45            | $2.67 \times 10^{-45}$  | 0.86       | hsa-miR-1273g-3p |
| MIMAT0019806         | 1.06            | $5.43 \times 10^{-45}$  | 0.85       | hsa-miR-4706     |
| MIMAT0000422         | 3.73            | $5.43 \times 10^{-45}$  | 0.89       | hsa-miR-124-3p   |
| MIMAT0015041         | 1.28            | $9.38 \times 10^{-45}$  | 0.86       | hsa-miR-1260b    |
| MIMAT0019869         | 3.16            | $9.50 \times 10^{-45}$  | 0.89       | hsa-miR-4740-5p  |
| MIMAT0005792         | 2.32            | $1.08 \times 10^{-44}$  | 0.89       | hsa-miR-320b     |
| MIMAT0031180         | 1.27            | $4.78 \times 10^{-43}$  | 0.87       | hsa-miR-7977     |
| MIMAT0000100         | 4.10            | $1.07 \times 10^{-42}$  | 0.86       | hsa-miR-29b-3p   |
| MIMAT0019810         | 2.78            | $2.73 \times 10^{-42}$  | 0.86       | hsa-miR-4708-3p  |
| MIMAT0019064         | 2.39            | $3.12 \times 10^{-42}$  | 0.85       | hsa-miR-4525     |
| MIMAT0003218         | 2.49            | $3.43 \times 10^{-42}$  | 0.87       | hsa-miR-92b-3p   |
| MIMAT0016878         | 1.01            | $4.69 \times 10^{-42}$  | 0.86       | hsa-miR-4257     |
| MIMAT0019848         | 2.68            | $7.55 \times 10^{-42}$  | 0.86       | hsa-miR-4727-3p  |
| MIMAT0000092         | 2.01            | $9.49 \times 10^{-42}$  | 0.86       | hsa-miR-92a-3p   |
| MIMAT0003326         | 1.08            | $1.02 \times 10^{-41}$  | 0.84       | hsa-miR-663a     |
| MIMAT0027474         | 1.23            | $5.33 \times 10^{-41}$  | 0.83       | hsa-miR-6787-5p  |
| MIMAT0014996         | 1.19            | $7.21 \times 10^{-41}$  | 0.85       | hsa-miR-3131     |
| MIMAT0027504         | 0.85            | $2.03 \times 10^{-40}$  | 0.84       | hsa-miR-6802-5p  |
| MIMAT0003330         | 2.54            | $3.90 \times 10^{-40}$  | 0.87       | hsa-miR-654-5p   |
| MIMAT0025847         | 1.93            | $1.70 \times 10^{-39}$  | 0.89       | hsa-miR-6511b-5p |
| MIMAT0004514         | 4.29            | $1.38 \times 10^{-38}$  | 0.83       | hsa-miR-29b-1-5p |
| MIMAT0018929         | 0.42            | $1.66 \times 10^{-38}$  | 0.88       | hsa-miR-4417     |

---

|              |      |                        |      |                 |
|--------------|------|------------------------|------|-----------------|
| MIMAT0019862 | 1.51 | $2.07 \times 10^{-38}$ | 0.87 | hsa-miR-4736    |
| MIMAT0027583 | 0.91 | $3.82 \times 10^{-38}$ | 0.84 | hsa-miR-6840-3p |
| MIMAT0019815 | 2.58 | $4.97 \times 10^{-38}$ | 0.85 | hsa-miR-4710    |

---
